# Supplementary material for: The impact of elective total hip and knee arthroplasty on physical performance in orthogeriatric patients: a prospective intervention study
Source: PubMed Central journal article supplement (PMC10664286; doi:10.1186/s12877-023-04460-6), 2023-11-21
Supplement: 12877_2023_4460_MOESM1_ESM.pdf [file 12877_2023_4460_MOESM1_ESM.pdf]

## Additional file 1

**Supplementary Table 1** Differences in SPPB subscores balance, gait speed and chair rise, Md (IQR)/Friedman test

| <b>SPPB Subscore</b> | <b>Pre-op</b> | <b>Post-op d3</b> | <b>Post-op d7</b> | <b>Post-op 4-6 wk</b> | <b>Post-op 12 wk</b> | <b>p</b>         |
|----------------------|---------------|-------------------|-------------------|-----------------------|----------------------|------------------|
| Balance total        | 3 (2-4)       | 2 (2-4)           | 3 (2-4)           | 3 (2-4)               | 4 (3-4)              | <b>&lt;0.001</b> |
| Balance hip          | 3 (2-4)       | 2 (2-4)           | 4 (2-4)           | 3 (2-4)               | 4 (3-4)              | <b>&lt;0.001</b> |
| Balance knee         | 3 (2-4)       | 2 (1-3)           | 3 (2-4)           | 3 (2-4)               | 3 (2-4)              | <b>0.001</b>     |
|                      |               |                   |                   |                       |                      |                  |
| <b>SPPB Subscore</b> | <b>Pre-op</b> | <b>Post-op d3</b> | <b>Post-op d7</b> | <b>Post-op 4-6 wk</b> | <b>Post-op 12 wk</b> | <b>p</b>         |
| Gait speed total     | 3 (2-4)       | 1 (1-2)           | 2 (1-3)           | 3 (3-4)               | 4 (3-4)              | <b>&lt;0.001</b> |
| Gait speed hip       | 3 (1-4)       | 1 (1-2)           | 2 (1-3)           | 3 (2-4)               | 4 (3-4)              | <b>&lt;0.001</b> |
| Gait speed knee      | 3 (2-4)       | 1 (1-2)           | 2 (1-3)           | 3 (3-4)               | 4 (3-4)              | <b>&lt;0.001</b> |
|                      |               |                   |                   |                       |                      |                  |
| <b>SPPB Subscore</b> | <b>Pre-op</b> | <b>Post-op d3</b> | <b>Post-op d7</b> | <b>Post-op 4-6 wk</b> | <b>Post-op 12 wk</b> | <b>p</b>         |
| Chair rise total     | 1 (1-2)       | 1 (0-1)           | 1 (0-2)           | 2 (1-3)               | 2 (1-3)              | <b>&lt;0.001</b> |
| Chair rise hip       | 1 (1-2)       | 1 (0-1)           | 1 (1-3)           | 2 (1-3)               | 2 (1-4)              | <b>&lt;0.001</b> |
| Chair rise knee      | 1 (1-3)       | 0 (0-1)           | 1 (0-2)           | 1 (0-3)               | 2 (1-3)              | <b>&lt;0.001</b> |

SPPB, Short Physical Performance Battery; Md, Median; IQR, Interquartile Range; p, p-value of the Friedman Test; d, day; wk, week
